# Supplementary material
Source: PubMed Central journal article supplement (PMC7001053)
Supplement: mmc2.pdf [file mmc2.pdf]

# Coactivation of Endogenous *Wnt10b* and *Foxc2* by CRISPR Activation Enhances BMSC Osteogenesis and Promotes Calvarial Bone Regeneration

Mu-Nung Hsu,<sup>1,8</sup> Kai-Lun Huang,<sup>1,8</sup> Fu-Jen Yu,<sup>1</sup> Po-Liang Lai,<sup>2,3</sup> Anh Vu Truong,<sup>1</sup> Mei-Wei Lin,<sup>1,4</sup> Nuong Thi Kieu Nguyen,<sup>1</sup> Chih-Che Shen,<sup>1</sup> Shiao-Min Hwang,<sup>5</sup> Yu-Han Chang,<sup>2,6</sup> and Yu-Chen Hu<sup>1,7</sup>

<sup>1</sup>Department of Chemical Engineering, National Tsing Hua University, Hsinchu, Taiwan; <sup>2</sup>Department of Orthopaedic Surgery, Chang Gung Memorial Hospital, Linkou 333, Taiwan; <sup>3</sup>Bone and Joint Research Center, Chang Gung Memorial Hospital, Linkou 333, Taiwan; <sup>4</sup>Biomedical Technology and Device Research Laboratories, Industrial Technology Research Institute, Hsinchu, Taiwan; <sup>5</sup>Bioresource Collection and Research Center, Food Industry Research and Development Institute, Hsinchu, Taiwan; <sup>6</sup>College of Medicine, Chang Gung University, Taoyuan 333, Taiwan; <sup>7</sup>Frontier Research Center on Fundamental and Applied Sciences of Matters, National Tsing Hua University, Hsinchu, Taiwan

**CRISPR activation (CRISPRa) is a burgeoning technology for programmable gene activation, but its potential for tissue regeneration has yet to be fully explored. Bone marrow-derived mesenchymal stem cells (BMSCs) can differentiate into osteogenic or adipogenic pathways, which are governed by the Wnt (Wingless-related integration site) signaling cascade. To promote BMSC differentiation toward osteogenesis and improve calvarial bone healing by BMSCs, we harnessed a highly efficient hybrid baculovirus vector for gene delivery and exploited a synergistic activation mediator (SAM)-based CRISPRa system to activate *Wnt10b* (that triggers the canonical Wnt pathway) and forkhead c2 (*Foxc2*) (that elicits the non-canonical Wnt pathway) in BMSCs. We constructed a Bac-CRISPRa vector to deliver the SAM-based CRISPRa system into rat BMSCs. We showed that Bac-CRISPRa enabled CRISPRa delivery and potently activated endogenous *Wnt10b* and *Foxc2* expression in BMSCs for >14 days. Activation of *Wnt10b* or *Foxc2* alone was sufficient to promote osteogenesis and repress adipogenesis *in vitro*. Furthermore, the robust and prolonged coactivation of both *Wnt10b* and *Foxc2* additively enhanced osteogenic differentiation while inhibiting adipogenic differentiation of BMSCs. The CRISPRa-engineered BMSCs with activated *Wnt10b* and *Foxc2* remarkably improved the calvarial bone healing after implantation into the critical-sized calvarial defects in rats. These data implicate the potentials of CRISPRa technology for bone tissue regeneration.**

## INTRODUCTION

Calvarial bone formation occurs in young infants, but adults lose the ability to generate calvarial bones, hence making the repair of large calvarial defects a challenging task.<sup>1</sup> Bone repair requires complex interplay among osteoprogenitor cells, osteoinductive growth factors, osteoconductive matrix, and angiogenesis.<sup>2</sup> To stimulate bone healing, osteoinductive genes can be delivered into osteoprogenitor cells, such as bone marrow-derived mesenchymal stem cells (BMSCs), to trigger osteogenic differentiation, followed by seeding into the osteo-

conductive scaffold and implantation into the defects. However, these approaches often fail to produce satisfactory calvarial bone healing.<sup>3,4</sup>

BMSCs are able to differentiate into competing lineages, including osteogenic and adipogenic pathways, and hold great promise in bone regeneration. One key to control the reciprocal relationship between osteogenic and adipogenic lineages is Wnt signaling, which stimulates osteogenesis and represses adipogenesis.<sup>5</sup> Therefore, activation of the Wnt signaling cascade increases bone mass<sup>6</sup> and improves bone healing.<sup>7</sup> In this regard, WNT10B is one of the 19 secreted Wnt ligands and can bind to its cognate surface receptor to trigger the canonical Wnt signaling cascade. Conversely, Forkhead c2 (FOXC2) is a transcription factor that triggers the noncanonical Wnt pathway<sup>8</sup> and also promotes osteogenesis and inhibits adipogenesis.<sup>9</sup>

CRISPR is a customizable, RNA-guided system that uses Cas9 nuclease and single-guide RNA (sgRNA) for targeted genome editing and has been explored for various applications.<sup>10–13</sup> Cas9 can be mutated to become a catalytically deactivated Cas9 (dCas9) protein and fused with a transcription activator (e.g., VP64) for CRISPR activation (CRISPRa) of the target gene.<sup>14</sup> To potentiate the magnitude of stimulation, a synergistic activation mediator (SAM)-based CRISPRa system was developed,<sup>15</sup> which consists of dCas9-VP64, a scaffold sgRNA, and an MPH (MS2 coat protein [MCP], p65, and activating domain of heat shock factor 1 [HSF1]) fusion protein effector. The scaffold sgRNA comprises a dCas9 binding domain, a spacer sequence that can be custom designed to bind the specific gene of

Received 8 October 2019; accepted 29 November 2019;  
<https://doi.org/10.1016/j.ymthe.2019.11.029>.

<sup>8</sup>These authors contributed equally to this work.

**Correspondence:** Yu-Chen Hu, Department of Chemical Engineering, National Tsing Hua University, Hsinchu, Taiwan.  
**E-mail:** [yuchen@che.nthu.edu.tw](mailto:yuchen@che.nthu.edu.tw)

**Correspondence:** Yu-Han Chang, Department of Orthopaedic Surgery, Chang Gung Memorial Hospital, Linkou 333, Taiwan.  
**E-mail:** [yhchang@cloud.cgmh.org.tw](mailto:yhchang@cloud.cgmh.org.tw)

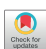

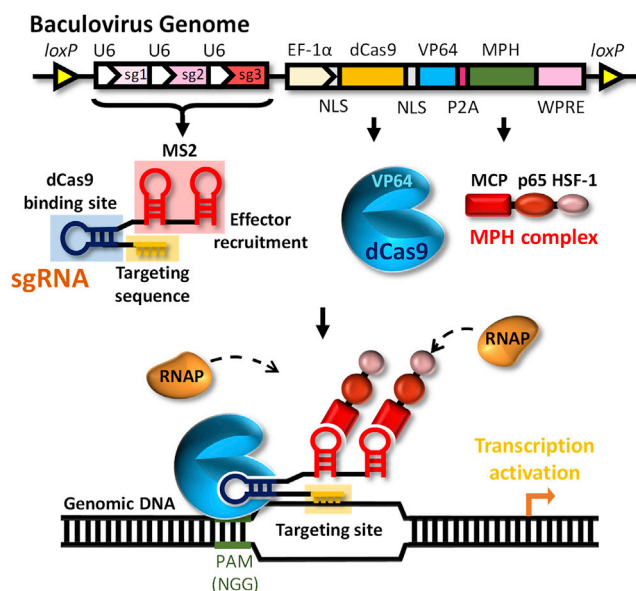

**Figure 1. Bac-CRISPRa System for Endogenous Gene Activation**

The CRISPRa system consists of dCas9-VP64, the MPH (MCP-p65-HSF1) activation effector, and the sgRNA array. The entire CRISPRa system was flanked by loxP sequences and encoded in the baculovirus genome. The dCas9 (with 5' and 3' NLS sequences), fused with the VP64 activation domain (dCas9-VP64), and MPH were separated by the P2A sequence and were driven by the rat CMV enhancer/rat EF-1 $\alpha$  promoter. The three sgRNA expression cassettes consisted of the hU6 promoter, sgRNA backbone with two MS2 coat protein (MCP) binding motifs, and the spacers targeting different sequences of interest. Baculovirus transduction would confer coexpression of dCas9-VP64, the MPH complex, and three sgRNAs in the same cells, after which, dCas9-VP64 associates with each sgRNA, binds to the specific genomic DNA sequence, and recruits the MPH complex and RNA polymerase (RNAP) to activate the gene expression. PAM, protospacer adjacent motif; WPRE, woodchuck hepatitis post-transcriptional response element (for enhancing mRNA stability).

interest, and two extra MS2 aptamers that recognize MCP. By expressing these components in the same cell, the scaffold sgRNA orchestrates with dCas9-VP64 to locate the genomic loci and recruits the MPH complex by the binding between MS2 aptamer and MCP to activate the gene expression. Such SAM-based CRISPRa has been exploited for basic research purposes,<sup>16–18</sup> but its potential in tissue regeneration has yet to be fully explored. Moreover, delivery of the complex SAM-based CRISPRa system into same cells is difficult for the commonly used adeno-associated virus (AAV) and lentivirus, due to limited packaging capacity.

In contrast, baculovirus is a nonpathogenic insect virus with a packaging capacity exceeding 38 kb, due to its large genome ( $\approx 134$  kb).<sup>19</sup> Baculovirus can carry (transduce) transgenes into stem cells at efficiencies exceeding 95%,<sup>20–22</sup> which is significantly more efficient than nonviral vectors. Therefore, baculovirus has been harnessed to modify stem cells genetically for the regeneration of cartilage,<sup>23,24</sup> bone,<sup>25,26</sup> nerve,<sup>27</sup> and heart.<sup>28</sup> Baculovirus neither replicates nor integrates its genome into the chromosomes of transduced cells, which

minimizes possible genotoxicity but restricts the duration of transgene expression.<sup>19</sup> To prolong the transgene expression, we previously developed a hybrid system comprising two baculovirus vectors: one expressing Cre recombinase (Bac-Cre) and the other substrate baculovirus harboring the transgene cassette flanked by loxP (locus of X-over P1) sites.<sup>29</sup> After cotransduction of BMSCs with the two baculovirus vectors, the expressed Cre recognizes the loxP sequences and excises the loxP-flanking transgene cassette off the substrate baculovirus genome. The excised transgene cassette re-circularizes and forms an episomal DNA minicircle encompassing the transgene within the cells.<sup>29,30</sup> This Cre/loxP-based hybrid baculovirus system was exploited to express a microRNA sponge or growth factor to augment stem cell differentiation and bone healing *in vivo*.<sup>7,31</sup>

Given the potentials of *Wnt10b* and *Foxc2* in stimulating osteogenic differentiation, here, we explored the SAM-based CRISPRa to upregulate *Wnt10b* and *Foxc2* selectively in BMSCs, alone or in combination, in attempts to stimulate calvarial bone regeneration. Given the large cloning capacity of the baculovirus, we constructed the Cre/loxP-based hybrid baculovirus to deliver the SAM-based CRISPRa system into rat BMSCs. We showed that the hybrid baculovirus robustly activated endogenous *Wnt10b* and *Foxc2* for a prolonged period of time. Coactivation of *Wnt10b* and *Foxc2* effectively stimulated osteogenesis and repressed adipogenesis *in vitro*. Implantation of the CRISPRa-engineered BMSCs into the critical-sized calvarial defects significantly improved the bone healing.

## RESULTS

### Design of Baculovirus System (Bac-CRISPRa) for CRISPRa Delivery

We first designed a baculovirus platform (Bac-CRISPRa) to deliver the SAM-based CRISPRa system for targeted activation of distinct endogenous genes (Figure 1). The baculovirus platform was designed to coexpress dCas9-VP64 and the MPH complex under the control of the rat elongation factor 1 $\alpha$  (EF-1 $\alpha$ ) promoter. The dCas9-VP64 fusion protein contained two flanking nuclear localization signals (NLSs) for nuclear transport. The MPH complex consisted of MCP, p65, and HSF1 for gene activation and was separated from dCas9-VP64 by the porcine teschovirus-1 2A (P2A) peptide. Additionally, the baculovirus expressed three sgRNA under the human U6 (hU6) promoter. Each of the sgRNA comprised distinct targeting (spacer) sequences but identical dCas9 binding domain and two MS2 binding aptamers for MPH recruitment. We chose to express an array of three sgRNA to target the same gene because multiple sgRNA together with dCas9-VP64 potentiates the gene activation effects.<sup>32,33</sup> We envisioned that baculovirus transduction would confer coexpression of dCas9-VP64, MPH complex, and three sgRNA in the same cells, after which, dCas9-VP64 associates with each sgRNA, binds to the specific genomic DNA sequence, and recruits the MPH complex and RNA polymerase (RNAP) to activate the gene expression (Figure 1). To prolong the effect of gene activation, we adopted the hybrid Cre/loxP-based baculovirus system and added two loxP sequences to flank the entire CRISPRa cassette.

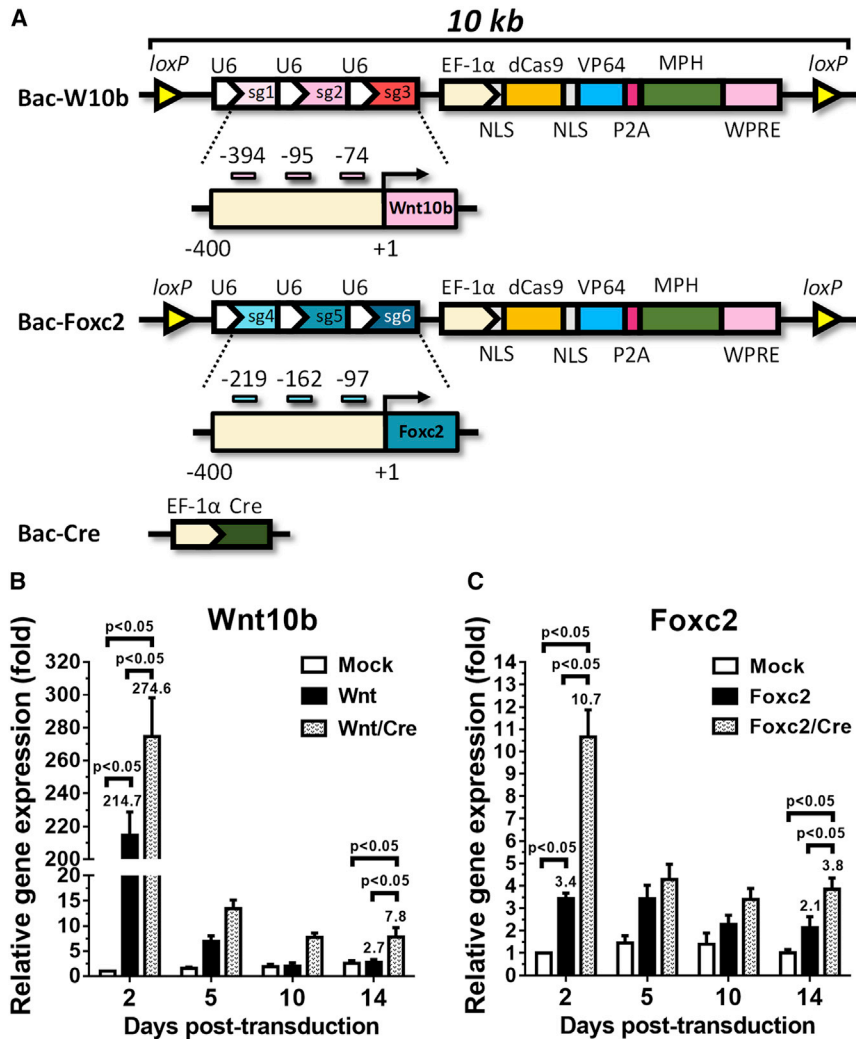

**Figure 2. Construction and Validation of Baculoviruses for *Wnt10b* and *Foxc2* Activation**

(A) Schematic of Bac-W10b, Bac-Foxc2, and Bac-Cre vectors. Bac-W10b and Bac-Foxc2 harbored the expression cassettes for dCas9-VP64, MPH, and three sgRNAs to target the upstream of transcription start sites of *Wnt10b* (–74, –95, and –394) and *Foxc2* (–97, –162, and –219). Bac-Cre expressed Cre recombinase under the rat EF-1 $\alpha$  promoter. (B) *Wnt10b* expression. (C) *Foxc2* expression. Rat BMSCs were singly transduced with Bac-W10b (MOI 200) or Bac-Foxc2 (MOI 200) or co-transduced with Bac-W10b/Bac-Cre (MOI 200/100) or Bac-Foxc2/Bac-Cre (MOI 200/100). The cells were analyzed for *Wnt10b* and *Foxc2* transcription by quantitative real-time RT-PCR at 2, 5, 10, and 14 days post-transduction. The expression levels in the transduced cells were normalized to those in Mock-transduced cells to yield the relative gene expression. The data represent mean  $\pm$  SD of three independent culture experiments. Student's *t* test was used to analyze statistical significance.

### Construction and Validation of Baculoviruses for *Wnt10b* and *Foxc2* Activation

We constructed two baculoviruses (Figure 2A) expressing identical dCas9-VP64 and MPH but distinct arrays of three sgRNAs targeting different regions of endogenous *Wnt10b* (Bac-W10b) and *Foxc2* (Bac-Foxc2). Spacer sequences on the sgRNA were designed using an online tool with windows from  $\approx -400$  to  $\approx -50$  bp, relative to the transcription start site of target genes (Figure 2A; Table S1). Cotransduction of cells with the hybrid Bac-W10b (or Bac-Foxc2) and Bac-Cre<sup>29</sup> that expressed the Cre recombinase (Figure 2A) would lead to the Cre-mediated excision of the CRISPRa system off the hybrid baculovirus, recircularization, and formation of the DNA minicircle ( $\approx 10$  kb) encompassing the CRISPRa system (Figure S1).

After vector construction, we mock transduced or transduced rat BMSCs with different baculovirus combinations and analyzed the gene expression by quantitative real-time reverse transcriptase PCR (quantitative real-time RT-PCR) (Figures 2B and 2C). Compared

with the Mock transduction control, single transduction with Bac-W10b (Wnt group) and Bac-Foxc2 (Foxc2 group) significantly activated the expression of *Wnt10b* ( $\approx 214.7$ -fold) and *Foxc2* ( $\approx 3.4$ -fold) at 2 days post-transduction (dpt). Yet the magnitude of activation decreased with time due to the rapid degradation of the large baculovirus genome.<sup>21,29</sup> In contrast, cotransduction with Bac-W10b/Bac-Cre (Wnt/Cre group) and Bac-Foxc2/Bac-Cre (Foxc2/Cre group) further substantiated the *Wnt10b* ( $\approx 274.6$ -fold) and *Foxc2* ( $\approx 10.7$ -fold) activation at 2 dpt. At 14 dpt, the *Wnt10b* (7.8-fold) and *Foxc2* (3.8-fold) in the Wnt/Cre and Foxc2/Cre groups still significantly ( $p < 0.05$ ) exceeded those in the Wnt and Foxc2 groups. These data confirmed that the CRISPRa system delivered by the hybrid baculovirus effectively activated endogenous genes in BMSCs for a prolonged period of time.

### *Wnt10b* and *Foxc2* Activation by Bac-CRISPRa Promoted Osteogenesis and Inhibited Adipogenesis

To assess whether the activation of *Wnt10b* and *Foxc2*, alone or in combination, could improve osteogenic differentiation and suppress adipogenic differentiation, we cotransduced BMSCs using Bac-Cre with Bac-W10b (Wnt/Cre group), Bac-Foxc2 (Foxc2/Cre group), or Bac-W10b/Bac-Foxc2 (Wnt/Foxc2/Cre group). Cells were cultured for 14 days in osteoinduction medium to induce osteogenesis or in adipoiduction medium to trigger adipogenesis. Mock-transduced cells were cultured similarly and served as a control.

After 14 days of osteoinduction, Alizarin red staining illustrated evidently more matrix mineralization in the Wnt/Cre and Foxc2/Cre



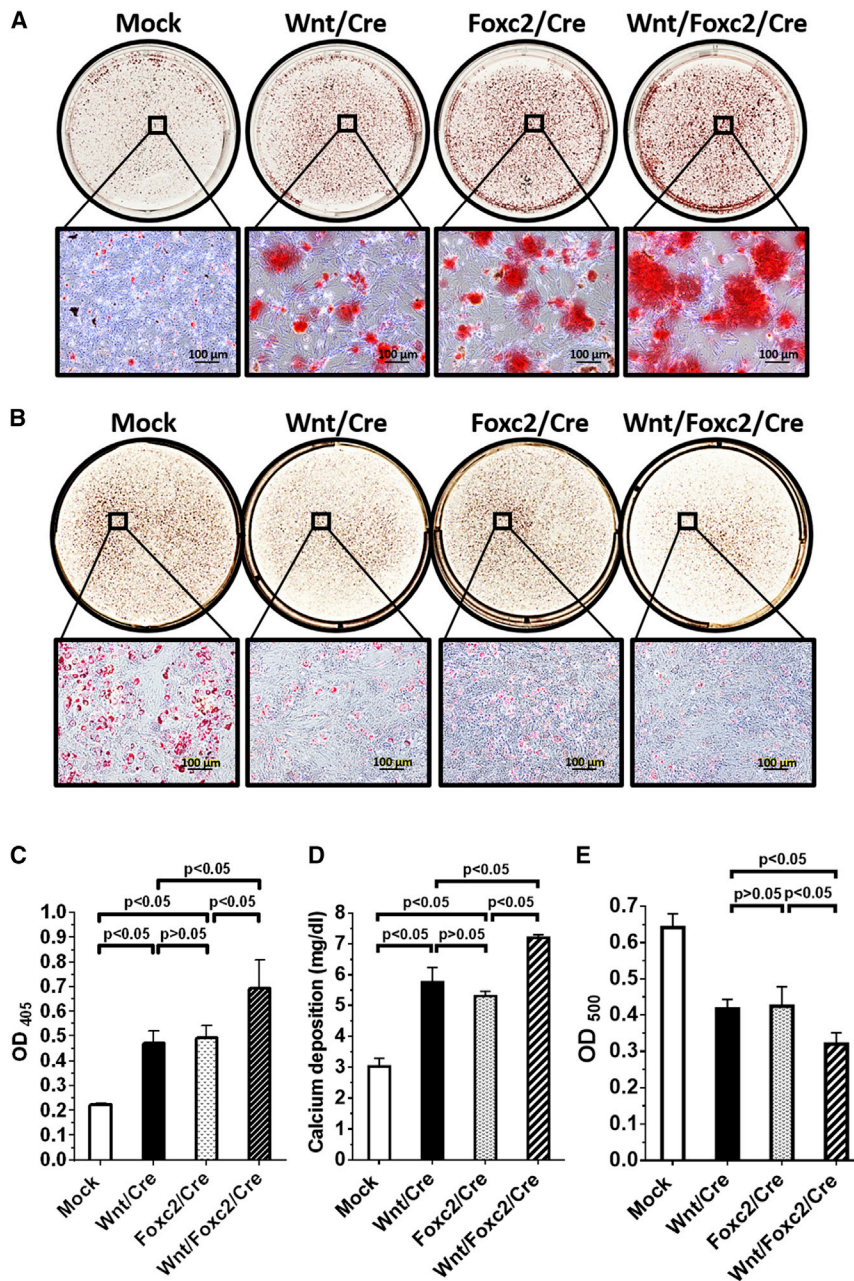

**Figure 3. *Wnt10b* and *Foxc2* Activation Promoted Matrix Mineralization and Inhibited Oil Accumulation**

(A) Alizarin red staining. (B) Oil Red O staining. (C) Quantification of Alizarin red staining. (D) Extracellular calcium deposition. (E) Quantification of Oil Red O staining. BMSCs were cotransduced with Bac-W10b/Bac-Cre (Wnt/Cre group) or Bac-Foxc2/ Bac-Cre (Foxc2/Cre group) at MOI 200/100. BMSCs were also transduced with Bac-W10b/Bac-Foxc2/Bac-Cre (Wnt/Foxc2/Cre group) at MOI 200/200/100. Cells were cultured for 14 days in osteoinduction medium to induce osteogenesis or in adipogenic medium to trigger adipogenesis. Mock-transduced cells were cultured similarly and served as a control. At 14 dpt, the osteoinduced cells were stained with Alizarin red while the adipogenic cells were stained with Oil Red O, followed by quantitative analysis. Alternatively, the osteoinduced cells were subject to a calcium deposition assay. The data represent mean  $\pm$  SD of three independent culture experiments. Student's *t* test was used to analyze statistical significance.

less oil accumulation than the Wnt/Cre and Foxc2/Cre groups. These data altogether showed that the activation of endogenous *Wnt10b* or *Foxc2* alone was sufficient to enhance osteogenesis and suppress adipogenesis in BMSCs, whereas coactivating *Wnt10b* and *Foxc2* additively augmented the effects. Therefore, in subsequent experiments, we only compared the Wnt/Foxc2/Cre and Mock groups.

To gain more insights into the osteogenic differentiation, we repeated the osteoinduction experiments as in Figure 3A and analyzed the expression of various osteogenic markers by quantitative real-time RT-PCR: *Runx2* (Runx2 runt-related transcription factor 2), *Opn* (osteopontin), *Ocn* (osteocalcin), and *Osx* (osterix). Figures 4A–4D depict that the Wnt/Foxc2/Cre group significantly ( $p < 0.05$ ) upregulated the expression of all of these osteogenic marker genes. Likewise, we repeated the adipogenic experiments as in Figure 3B and analyzed the expression of three adipogenic marker genes: *Ppar $\gamma$*  (peroxisome proliferator-activated receptor  $\gamma$ ), *C/ebp- $\alpha$*  (CCAAT/enhancer binding protein  $\alpha$ ), and *Fabp4* (fatty acid-binding protein 4) by quantitative real-time RT-PCR. Figures 4E–4G show that the Wnt/Foxc2/Cre group significantly ( $p < 0.05$ ) attenuated the expression of all of these adipogenic genes.

#### CRISPRa Coactivation of *Wnt10b* and *Foxc2* Improved Calvarial Bone Healing

Figures 3 and 4 collectively demonstrate that CRISPRa-mediated coactivation of *Wnt10b* and *Foxc2* in BMSCs augmented

groups than in the Mock group (Figure 3A). After 14 days of adipogenic induction, conversely, Oil Red O staining showed less oil-droplet accumulation in the Wnt/Cre and Foxc2/Cre groups than in the Mock group (Figure 3B). Quantification of matrix stained by Alizarin red (Figure 3C) and another calcium deposition assay (Figure 3D) further confirmed that the Wnt/Cre and Foxc2/Cre groups improved the mineralization. Likewise, quantification of oil droplet stained by Oil Red O attested that Wnt/Cre and Foxc2/Cre groups attenuated the oil-droplet formation (Figure 3E). Importantly, the qualitative (Figures 3A and 3B) and quantitative (Figures 3C–3E) analyses demonstrated that the Wnt/Foxc2/Cre group exhibited more potent matrix mineralization and

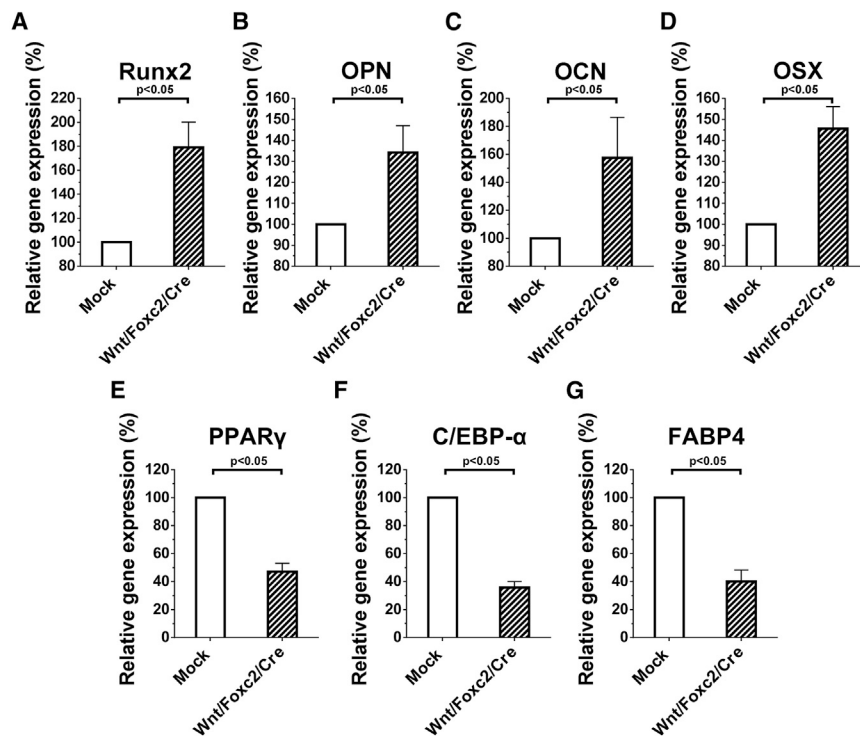

**Figure 4. Upregulation of Osteogenic Genes and Downregulation of Adipogenic Genes by *Wnt10b* and *Foxc2* Activation**

(A) *Runx2*. (B) *Opn*. (C) *Ocn*. (D) *Osx*. (E) *Ppar $\gamma$* . (F) *C/ebp- $\alpha$* . (G) *Fabp4*. The rat BMSCs were transduced and cultured as in Figure 3. The gene-expression levels were analyzed by quantitative real-time RT-PCR at days 5 (*Ppar $\gamma$* , *C/ebp- $\alpha$* , *Fabp4*, and *Runx2*), 10 (*Opn*), or 14 (*Ocn* and *Osx*) and normalized to those of the mock-transduced BMSCs at the same day. The data represent mean  $\pm$  SD of three independent culture experiments. Student's t test was used to analyze statistical significance.

osteogenesis/mineralization and repressed adipogenesis *in vitro*. To demonstrate the *in vivo* healing, we transduced rat BMSCs with Bac-*Wnt10b*/Bac-*Foxc2*/Bac-*Cre* (*Wnt/Foxc2/Cre* group), seeded the cells to gelatin scaffold, and implanted the cell/scaffold constructs to critical-size calvarial bone defects (6 mm in diameter) in rats ( $n = 7$ ). As a control, mock-transduced BMSCs were seeded to scaffolds and implanted in the same manner ( $n = 5$ ).

The top (Figures 5A–5D) and sagittal (Figures 5E–5H) views of micro-computed tomography ( $\mu$ CT) imaging illustrated that the Mock group barely triggered bone formation, even at week 8 (Figures 5C and 5G), indicating that BMSCs in gelatin scaffold were insufficient to heal such large calvarial bone defects. Conversely, the *Wnt/Foxc2/Cre* group elicited evident bone formation at the peripheral of the defect at week 4 (Figure 5B). The bone growth continued with enlarged bone area (Figure 5D) and apparent bone bridging (Figure 5H) at week 8. Quantitative analyses using the  $\mu$ CT images revealed only marginal increases in the bone area, bone volume, and bone density with time in the Mock group (Figures 5I–5K). In contrast, the bone area, volume, and density increased sharply with time in the *Wnt/Foxc2/Cre* group, filling 36.5% of the original defect area (Figure 5I) and  $\approx$  40.6% of the original defect volume (Figure 5J) at week 8, with the corresponding bone density (Figure 5K) reaching  $\approx$  29.6% that of the original defect.

After  $\mu$ CT imaging at week 8, calvarial bone specimens were harvested for histochemical and immunohistochemical staining. As illustrated by H&E staining (Figure 6A), the Mock group was mostly

filled with disordered fibrous tissues, whereas the *Wnt/Foxc2/Cre* group was filled with abundant ordered and organized bone matrix. OPN and bone sialoprotein (BSP) are markers of osteoblasts and osteocytes, respectively.<sup>34</sup> Immunohistochemical staining demonstrated ample deposition of OPN (Figure 6B) and BSP (Figure 6C) in the *Wnt/Foxc2/Cre* groups but not in the Mock group.

Bone remodeling is critical for successful bone repair in the long term and requires the osteoclast activity; thus, we also performed histochemical staining for tartrate-resistant acid phosphatase (TRAP), which is active in osteoclasts and is a marker of bone remodeling.<sup>35</sup> Figure 6D illustrates much denser TRAP staining in the *Wnt/Foxc2/Cre* groups than in the Mock group. Quantitative analysis of the staining results confirmed that the *Wnt/Foxc2/Cre* group conferred more abundant accumulation of OPN and BSP (Figure 6E) and more TRAP<sup>+</sup> osteoclasts (Figure 6F) than the Mock group. Figures 5 and 6 attest that coactivation of *Wnt10b* and *Foxc2* in BMSCs improved the bone formation and remodeling processes.

## DISCUSSION

Since its advent, CRISPRa has been exploited for such applications as interrogation of gene regulatory networks,<sup>36,37</sup> genetic screening,<sup>16,38–40</sup> engineering of signaling pathways,<sup>41</sup> and cell-fate manipulation.<sup>32,42</sup> Despite the promise of CRISPRa in fundamental research *in vitro*, the potentials of CRISPRa for *in vivo* healing or regeneration of tissues remain poorly explored. One recent study harnessed CRISPRa to activate genes *in vivo* to promote the wound healing of corneal endothelial injury.<sup>43</sup> Other studies employed CRISPRa to ameliorate the muscular dystrophy symptoms in mice<sup>44</sup> or to stimulate the regeneration of injured sciatic nerves in rat models.<sup>45</sup> More recently, we developed a CRISPRai system that enables simultaneous activation of *Sox9* and repression of *Ppar $\gamma$*  in BMSCs, so as to promote bone healing after implantation of the engineered BMSCs.<sup>46</sup>

Here, we developed a Bac-CRISPRa vector that exploits the *Cre/loxP*-based hybrid baculovirus for the delivery of SAM-based CRISPRa

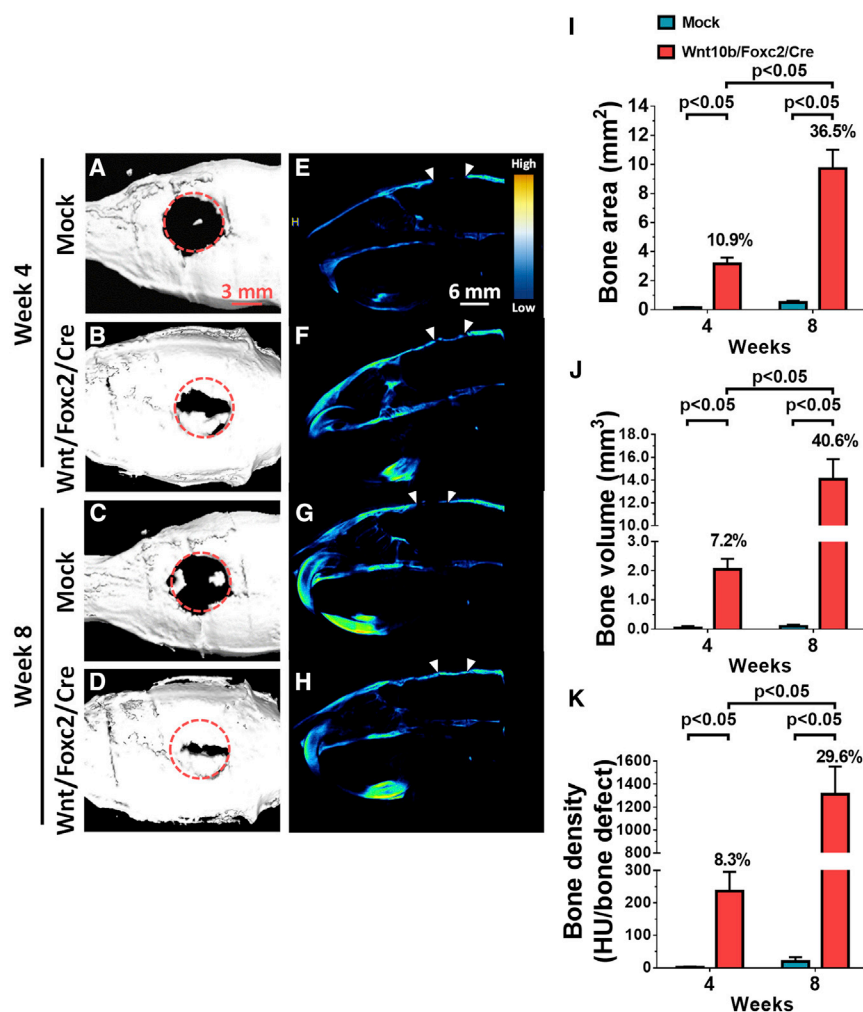

**Figure 5. Calvarial Bone Healing Evaluated by  $\mu$ CT**

(A–D) Top views of regenerated bones at weeks 4 and 8. (A) Mock, week 4. (B) Wnt/Foxc2/Cre, week 4. (C) Mock, week 8. (D) Wnt/Foxc2/Cre, week 8. (E–H) Sagittal views of regenerated bones at weeks 4 and 8. (E) Mock, week 4. (F) Wnt/Foxc2/Cre, week 4. (G) Mock, week 8. (H) Wnt/Foxc2/Cre, week 8. (I) Bone area. (J) Bone volume. (K) Bone density. BMSCs were mock transduced (Mock group,  $n = 5$ ) or cotransduced with Bac-W10b/Bac-Foxc2/Bac-Cre (Wnt10b/Foxc2/Cre group,  $n = 7$ ), seeded to gelatin scaffolds, and implanted into the calvarial bone defect (6 mm in diameter). The  $\mu$ CT images were captured at weeks 4 and 8 and analyzed for bone area, volume, and density. Two-way ANOVA was used to analyze statistical significance.

Despite the lower magnitude of activation, *Foxc2* activation (Foxc2/Cre group; Figure 3) promoted matrix mineralization and inhibited oil-droplet accumulation in BMSCs as effectively as *Wnt10b* activation (Wnt/Cre group; Figure 3). WNT10B is known to trigger canonical Wnt/ $\beta$ -catenin signaling, which leads to stabilization and nuclear transport of the transcription factor  $\beta$ -catenin.<sup>6</sup> The activated Wnt/ $\beta$ -catenin pathway promotes osteogenic differentiation and represses adipogenic differentiation by activating master osteogenic transcription factor RUNX2 and inhibiting the adipogenic master regulatory genes *C/EBP- $\alpha$*  and *PPAR $\gamma$* .<sup>49</sup> Conversely, FOXC2 provokes the noncanonical Wnt signaling pathway through a mechanism independent of  $\beta$ -catenin. FOXC2 activates *Wnt4*,<sup>50,51</sup> which is a Wnt ligand that promotes osteogenic differentiation

into rat BMSCs to activate *Wnt10b* and *Foxc2* (Figures 1 and 2A). Among the several CRISPRa systems, we chose the SAM-based CRISPRa system because it enables more robust gene activation than other CRISPRa systems.<sup>17,47</sup> The hybrid Bac-CRISPRa system enabled efficient baculovirus-mediated gene delivery and formation of the minicircle that encompassed the CRISPRa system for gene activation (Figure S1). The resultant DNA minicircle ( $\approx 10$  kb) was smaller than the baculoviral genome ( $\approx 134$  kb) and was devoid of bacterial components,<sup>30</sup> thus avoiding intracellular nuclease attack and allowing for prolonged existence and gene expression within the cells.<sup>7,27</sup> With the same CRISPRa module (dCas9 and MPH) but different sgRNA combinations, the hybrid Bac-CRISPRa system robustly activated *Wnt10b* and *Foxc2* for at least 14 days, albeit to varying degrees (274.6-fold versus 10.7-fold; Figures 2B and 2C). The sgRNA was designed following the same rules (targeting the template strand upstream of the transcriptional start site);<sup>38,48</sup> thus, the differential activation magnitude probably stemmed from the discrepancy in the basal expression level and local chromatin structure in *Wnt10b* and *Foxc2*.

of BMSCs by activating the p38 mitogen-activated protein kinase (MAPK) pathway<sup>52</sup> and triggers bone formation by inhibiting nuclear factor- $\kappa$ B.<sup>53</sup> Moreover, FOXC2 activates the expression of osteoinductive growth factor bone morphogenetic protein (BMP)-4<sup>50</sup> and blocks adipogenic differentiation.<sup>54</sup> FOXC2 also promotes the secretion of stromal cell-derived factor 1 (SDF-1) and activates the chemokine receptor 4 (CXCR4).<sup>55</sup> SDF-1 can bind to CXCR4 and initiate extracellular signal-regulated kinase 1/2 (ERK1/2) pathways, thus enhancing the levels of *Runx2* by preventing *Runx2* degradation.<sup>31</sup> These  $\beta$ -catenin-independent, noncanonical mechanisms induced by *Foxc2* might collectively contribute to BMSC osteogenesis as effectively as the canonical Wnt pathway induced by *Wnt10b* (Figure S2).

When both *Wnt10b* and *Foxc2* were coactivated (Wnt/Foxc2/Cre group), the canonical and noncanonical Wnt pathways converged to enhance further the osteogenic differentiation and inhibited adipogenic differentiation of BMSCs *in vitro* (Figures 3 and 4). Consequently, implantation of the BMSCs into the critical-sized calvarial bone defects significantly improved the bone formation and



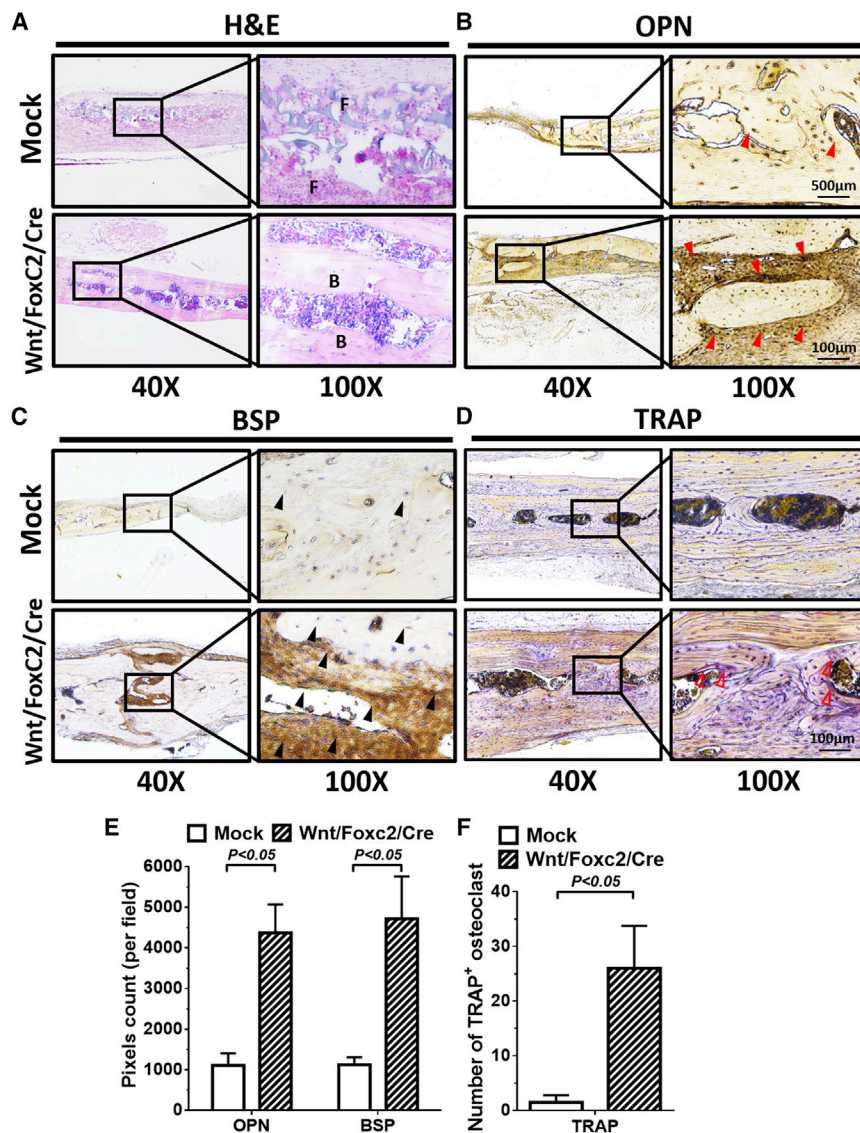

**Figure 6. Histological and Immunohistochemical Staining Evaluated**

(A) H&E staining. (B) Osteopontin (OPN) staining. (C) Bone sialoprotein (BSP) staining. (D) TRAP staining. (E) Statistical analysis of staining results (pixels count/field). The rats were sacrificed at 8 weeks postimplantation, and the calvarial bones were removed and sectioned for histological or immunohistochemical staining. (F) Statistical analysis of number of TRAP<sup>+</sup> osteoclasts. Red arrowheads indicate OPN; black arrowheads indicate BSP. Open arrowheads indicate TRAP. F, fibrous tissue; B, bone tissue. For quantitative analysis, five fields from each section were analyzed using ImageJ software. Representative images of five animals are shown and the data represent the mean ± SD. Student's t test was used to analyze statistical significance.

bone remodeling *in vivo* (Figures 5 and 6). In addition to promoting osteogenesis, *Foxc2* also induces the vascular endothelial growth factor (VEGF) expression and stimulates new blood-vessel formation,<sup>56</sup> which might contribute to the potent calvarial bone healing in the *Wnt/Foxc2/Cre* group (Figure S2). It should be noted, however, that *Foxc2* plays pleiotropic roles in cell proliferation and may be involved in cancer progression.<sup>55</sup> Therefore, caution should be used when choosing *Foxc2* as the activation target. Fortunately, baculovirus genome and the episomal DNA minicircle were degraded with time;<sup>29,57</sup> thus, the Bac-CRISPRa system only temporarily activated *Wnt10b* and *Foxc2* (Figure 2), which reduced the potential risk.

Recent decades have witnessed the marriage of gene therapy and regenerative medicine, wherein exogenous genes encoding growth factors or transcription factors are delivered into stem cells and implanted into

the damaged tissue to stimulate regeneration.<sup>4,58</sup> Albeit effective and promising, intricate and regulatable gene expression is desirable, yet to date, the exogenous gene is often driven by a constitutive promoter, and the expression level is difficult to control. In contrast to the conventional cell-based gene-therapy approach, the Bac-CRISPRa system enables facile and tunable control of gene-activation level by altering the baculovirus dose and by changing the sgRNA design. The number of sgRNAs in the sgRNA array and the spacer sequences can be varied to target distinct sites in a given genomic locus to recruit activators differentially, so as to fine tune the expression level.<sup>59,60</sup>

Furthermore, the Bac-CRISPRa system is programmable and capable of activating multiple target genes if several sgRNAs are accommodated in the 134-kb baculovirus genome.<sup>45</sup> Besides *Wnt10b* and *Foxc2*, other growth factors, such as BMP-2; VEGF; Wnt ligands, such as *Wnt3a*<sup>6</sup> and *Wnt6*<sup>61</sup>; as well as transcription factors, such as RUNX2 and msh homeobox homolog 2 (*Msx2*),<sup>62</sup> are known to promote bone healing. FOXC2 is also shown to cooperate with BMP-2<sup>8</sup> or long noncoding RNA H19<sup>51</sup> to promote synergistically bone matrix mineralization by stem cells. The Bac-CRISPRa system may be designed to coactivate a combinatory library of these factors, which could further optimize calvarial bone healing and enable identification of the combination of factors contributing to the optimal regeneration.

In summary, we developed the Bac-CRISPRa system to activate the two genes (*Wnt10b* and *Foxc2*) governing both canonical and non-canonical Wnt pathways, as well as complementary pathways. The robust and prolonged coactivation of *Wnt10b* and *Foxc2* in BMSCs potentiated osteogenesis and repressed adipogenesis *in vitro*, thereby substantiating the calvarial bone healing *in vivo*.

## MATERIALS AND METHODS

### Isolation and Culture of BMSCs

All procedures involving animal experiments were approved by the Institutional Animal Care and Use Committee of National Tsing Hua University and performed in compliance with the Guide for the Care and Use of Laboratory Animals (Ministry of Science and Technology, Taiwan). BMSCs were isolated from the tibial and femoral bone marrow of 4-week-old Sprague-Dawley rats (Lesco Biotech, Taiwan), as described earlier<sup>31</sup> and in the [Supplemental Methods](#). BMSCs of passages 3–5 were used for subsequent experiments.

### Construction and Preparation of Baculovirus Vectors

The baculovirus vectors were constructed using pBac-LEW<sup>31</sup> as the starting backbone, which contained two loxP sites flanking a cytomegalovirus (CMV) enhancer/rat EF-1 $\alpha$  promoter, multiple cloning site (MCS), and woodchuck hepatitis post-transcriptional response element (WPRE). The *Streptococcus pyogenes* dCas9 gene was PCR amplified from pcDNA-dCas9-p300 Core (Addgene #61357<sup>63</sup>) with a 5' and 3' flanking NLS. The resultant NLS-dCas9-NLS fragment was subcloned into the MCS of pBac-LEW, downstream of the CMV enhancer/rat EF-1 $\alpha$  promoter, to generate pBac-dCas9. The activation domain of transcription activator VP64 was PCR amplified from pHAGE EF-1 $\alpha$  dCas9-VP64 (Addgene #50918<sup>33</sup>) and inserted downstream of the NLS-dCas9-NLS sequence in pBac-dCas9 to yield pBac-dCas9\_VP64. The MCP-p65-HSF1 (MPH) fusion gene was PCR amplified from pMS2-P65-HSF1\_GFP (Addgene #61423<sup>15</sup>) with a P2A sequence at the 5' end. The P2A-MPH gene fragment was subcloned into pBac-dCas9\_VP64, downstream of dCas9-VP64, to generate pBac-dCas9\_VP64\_MPH.

The sgRNA cassette, including the hU6 promoter, a spacer insertion linker, and the sgRNA scaffold with two MS2 coat protein (MCP) recognition aptamer sequences, was PCR amplified from the sgRNA (MS2) cloning backbone (Addgene #61424<sup>15</sup>). The spacer sequences targeting *Wnt10b* and *Foxc2* were designed using a guide RNA design tool CRISPR-ERA (<http://crispr-era.stanford.edu/>). The 20-nt spacer sequences with the highest targeting specificity scores (from –400 to –50 relative to the transcription start site [Table S1]) were chosen, chemically synthesized, annealed, and inserted into *BbsI*-digested pTA-sgRNA. The resultant sgRNA sequences were subcloned into another MCS in pBac-dCas9\_VP64\_MPH to yield pBac-Wnt10b or pBac-Foxc2.

pBac-Wnt10b and pBac-Foxc2 were used to generate baculovirus vectors Bac-Wnt10b and Bac-Foxc2, respectively, using the Bac-To-Bac system (Thermo Fisher Scientific). The baculovirus Bac-Cre that expressed Cre recombinase under the rat EF-1 $\alpha$  promoter was constructed previously.<sup>29</sup> Baculovirus vectors were amplified by infecting insect cell Sf-9. The virus supernatant was harvested at 4 days postinfection by centrifugation, and virus titers were determined by the end-point dilution method.<sup>30</sup>

### Baculovirus Transduction, Osteoinduction, and Adipoinduction

Baculovirus transduction of rat BMSCs was performed as described.<sup>30</sup> Briefly, rat BMSCs were seeded to 6-well plates ( $2 \times 10^5$  cells/well) for

*in vitro* experiments or 15-cm dish ( $2.5 \times 10^6$  cells/dish) for animal experiments. Cells were cultured overnight in  $\alpha$ -minimal essential medium ( $\alpha$ -MEM) containing 10% fetal bovine serum (FBS), 100 IU/ml penicillin, and 100 IU/ml streptomycin. In parallel, the baculovirus supernatant was diluted with fresh Grace's medium (Sigma) for which the volume depended on the MOI and baculovirus titer. The diluted virus was further mixed with NaHCO<sub>3</sub>-free  $\alpha$ -MEM at a volumetric ratio of 1:4.<sup>64</sup> For mock transduction, virus-free Grace's medium was mixed with NaHCO<sub>3</sub>-free  $\alpha$ -MEM at a volumetric ratio of 1:4.

To initiate virus transduction, rat BMSCs were washed twice with PBS (pH 7.4), added with the corresponding virus solution (0.5 mL/well for 6-well plates and 7.5 mL/dish for 15-cm dishes) at the desired MOI, and gently shaken on a rocking plate at room temperature for 6 h. After transduction, the virus solution was replaced with osteoinduction medium ( $\alpha$ -MEM containing 10% FBS, 100 IU/ml penicillin, 100 IU/ml streptomycin, 0.1  $\mu$ M dexamethasone, 10 mM  $\beta$ -glycerol phosphate, and 50  $\mu$ M ascorbic acid 2-phosphate) containing 3  $\mu$ M sodium butyrate,<sup>23</sup> and cells continued to be cultured at 37°C.

After 24 h, the cells were harvested for animal experiments. Alternatively, transduced cells continued to be cultured by replacing the medium with fresh osteoinduction medium (for gene-activation analysis or osteoinduction). The medium was replenished every 2–3 days until analysis. Conversely, to induce adipogenic differentiation, the medium was replaced in the same manner but with adipogenic medium prepared using adipocyte differentiation basal medium and adipogenesis supplement (StemPro Adipogenesis Differentiation Kit; Gibco).

### Quantitative Real-Time RT-PCR

Total RNA was isolated from the cells using the Quick-RNA Miniprep kit (Zymo Research) and reverse transcribed to cDNA using the High-Capacity cDNA Reverse Transcription Kit (Applied Biosystems). The cDNA was subjected to quantitative real-time PCR (StepOnePlus Real-Time PCR Systems; Applied Biosystems) using primers specific to *Wnt10b*, *Foxc2*, *Runx2*, *Opn*, *Ocn*, *Osx*, *Ppar $\gamma$* , *Clebp- $\alpha$* , and *Fabp4* (Table S2). The gene-expression levels in the transduced cells were normalized against *Gapdh* and referenced to that of the mock-transduced BMSCs.

### Bone Matrix Mineralization, Calcium Deposition, and Oil-Droplet Accumulation

Bone matrix mineralization and calcium deposition are important signs of osteogenic differentiation.<sup>65</sup> After culturing rat BMSCs in osteoinduction medium for 14 days, the matrix mineralization was stained by Alizarin Red S (A5533; Sigma-Aldrich), followed by quantitative analysis. The calcium deposition was measured using the Calcium Liquicolor Complete Test kit (Human). Alternatively, the cells were cultured in adipogenic medium for 14 days, and oil-droplet formation was stained by Oil Red O, followed by quantitative analysis. All of these procedures are described in detail in [Supplemental Methods](#).



### Fabrication of rBMSCs/Scaffold Constructs and Surgical Procedures

To fabricate the rBMSCs/scaffold constructs for *in vivo* bone healing, the Spongostan gelatin sponge (porosity  $\approx 97\%$ , cat. #MS0003; Ethicon) was cut into disks (diameter  $\approx 6$  mm) and submerged in PBS for 30 min. The mock-transduced and transduced rBMSCs were trypsinized from 15-cm dishes at 1 dpt, resuspended in  $\alpha$ -MEM, seeded onto the gelatin scaffold ( $5 \times 10^6$  cells/scaffold), and allowed to adhere for 4 h. The rBMSCs/scaffold constructs were cultured with osteoinduction medium containing 3 mM sodium butyrate for 24 h.

In parallel, 6-week-old female Sprague-Dawley rats were anesthetized by intramuscular injection of Zoletil 50 (25 mg/kg body weight; Virbac Animal Health) and 2% Rompun (0.15 mL/kg body weight; Bayer Health Care), followed by intramuscular injection of the antibiotic cefazolin (160 mg/kg body weight). A midline sagittal incision (2 cm) on the scalp was made to expose the parietal bone, and the pericranium was removed carefully by blunt scraping. A critical-size (6 mm in diameter) defect in the middle of the parietal bone was created using a disposable biopsy punch (Integra Miltex) without disturbing the underlying dura mater. Damage to the dura mater could lead to poor regeneration. To minimize damage to the skull and adjacent blood vessels, sterile saline solution was sprayed to the skull to reduce the temperature upon creating the defects by drilling. The constructs were implanted onto the defect and gently pressed, followed by suturing with a 4-0 absorbable stitch (Polysorb; Covidien). The animals received a second intramuscular injection of cefazolin and a topical administration of neomycin and bacitracin zinc at the surgery site.

### $\mu$ CT Imaging Analysis

The calvarial bone regeneration was evaluated using Nano SPECT/CT (Cold Spring Harbor) at the tube voltage of 100 kV and 16  $\mu$ m resolution. The 3-dimensional images of calvarial bone regeneration were reconstructed using Amira software (Visualization Science Group). The regenerating bone area (square millimeter), bone volume (cubic millimeter), and bone density (average Hounsfield Unit [HU]) were evaluated using PMOD software (PMOD Technologies) within a chosen disk-shaped volume of interest (VOI; 6 mm in diameter and 1 mm in height) that matched the original defect. The data were normalized to the original defect area (28.3 mm<sup>2</sup>), volume (28.3 mm<sup>3</sup>), and density ( $\approx 4,600$  HU) to yield the percentage of bone regeneration.

### Histological and Immunohistochemical Staining

After  $\mu$ CT scanning, the calvarial bone specimens were removed and immersed in Osteosoft (Merck) for 15–20 days for complete decalcification and dehydrated in a series of graded concentration of ethanol from 70% to 100%. Details for subsequent H&E staining, histochemical staining of TRAP, immunohistochemical staining of OPN, and BSP are described in [Supplemental Methods](#).

### Statistical Analysis

All quantitative data were analyzed using two-way ANOVA or Student's *t* test using a two-tailed distribution. The *in vitro* data

represent the mean  $\pm$  SD of at least three independent experiments.  $p < 0.05$  was considered significant.

### SUPPLEMENTAL INFORMATION

Supplemental Information can be found online at <https://doi.org/10.1016/j.ymthe.2019.11.029>.

### AUTHOR CONTRIBUTIONS

M.-N.H. and K.-L.H. designed and performed experiments and wrote the manuscript. F.-J.Y., P.-L.L., A.V.T., M.-W.L., N.T.K.N., and C.-C.S. performed experiments. S.-M.H. provided cells and supervised experiments. Y.-H.C. and Y.-C.H. designed experiments, supervised project progress, and wrote the manuscript.

### CONFLICTS OF INTEREST

The authors declare no competing interests.

### ACKNOWLEDGMENTS

The data shown in this paper are available in the article and its supplemental data files or available from the authors upon request. The authors acknowledge financial support from the Ministry of Science and Technology (MOST; 105-2923-E-007-002-MY3, 107-2221-E-007-046-MY3, and 108-3017-F-007-003) and CGMH Intramural Project (CRRPG3E0173 and CMRPG310181). This work was also financially supported by the Frontier Research Center on Fundamental and Applied Sciences of Matters and from the Featured Areas Research Center Program within the framework of the Higher Education Sprout Project by the Ministry of Education (MOE; 108QR001I5), Taiwan.

### REFERENCES

1. Szpalski, C., Barr, J., Wetterau, M., Saadeh, P.B., and Warren, S.M. (2010). Cranial bone defects: current and future strategies. *Neurosurg. Focus* 29, E8.
2. Lopes, D., Martins-Cruz, C., Oliveira, M.B., and Mano, J.F. (2018). Bone physiology as inspiration for tissue regenerative therapies. *Biomaterials* 185, 240–275.
3. Shapiro, G., Lieber, R., Gazit, D., and Pelled, G. (2018). Recent advances and future of gene therapy for bone regeneration. *Curr. Osteoporos. Rep.* 16, 504–511.
4. Lu, C.-H., Chang, Y.-H., Lin, S.-Y., Li, K.-C., and Hu, Y.-C. (2013). Recent progresses in gene delivery-based bone tissue engineering. *Biotechnol. Adv.* 31, 1695–1706.
5. Leucht, P., Lee, S., and Yim, N. (2019). Wnt signaling and bone regeneration: Can't have one without the other. *Biomaterials* 196, 46–50.
6. Bennett, C.N., Longo, K.A., Wright, W.S., Suva, L.J., Lane, T.F., Hankenson, K.D., and MacDougald, O.A. (2005). Regulation of osteoblastogenesis and bone mass by Wnt10b. *Proc. Natl. Acad. Sci. USA* 102, 3324–3329.
7. Li, K.-C., Chang, Y.-H., Yeh, C.-L., and Hu, Y.-C. (2016). Healing of osteoporotic bone defects by baculovirus-engineered bone marrow-derived MSCs expressing MicroRNA sponges. *Biomaterials* 74, 155–166.
8. Zhang, W., Zhang, X., Li, J., Zheng, J., Hu, X., Xu, M., Mao, X., and Ling, J. (2018). Foxc2 and BMP2 induce osteogenic/odontogenic differentiation and mineralization of human stem cells from *Apical Papilla*. *Stem Cells Int.* 2018, 2363917.
9. You, W., Fan, L., Duan, D., Tian, L., Dang, X., Wang, C., and Wang, K. (2014). Foxc2 over-expression in bone marrow mesenchymal stem cells stimulates osteogenic differentiation and inhibits adipogenic differentiation. *Mol. Cell. Biochem.* 386, 125–134.
10. Li, L., Hu, S., and Chen, X. (2018). Non-viral delivery systems for CRISPR/Cas9-based genome editing: Challenges and opportunities. *Biomaterials* 171, 207–218.

11. Zhang, Y., Shen, S., Zhao, G., Xu, C.-F., Zhang, H.-B., Luo, Y.-L., Cao, Z.T., Shi, J., Zhao, Z.B., Lian, Z.X., and Wang, J. (2019). In situ repurposing of dendritic cells with CRISPR/Cas9-based nanomedicine to induce transplant tolerance. *Biomaterials* *217*, 119302.
12. Li, X.L., Li, G.H., Fu, J., Fu, Y.W., Zhang, L., Chen, W., Arakaki, C., Zhang, J.P., Wen, W., Zhao, M., et al. (2018). Highly efficient genome editing via CRISPR-Cas9 in human pluripotent stem cells is achieved by transient BCL-XL overexpression. *Nucleic Acids Res.* *46*, 10195–10215.
13. Sung, L.-Y., Wu, M.-Y., Lin, M.-W., Hsu, M.-N., Truong, V.A., Shen, C.-C., Tu, Y., Hwang, K.Y., Tu, A.P., Chang, Y.H., and Hu, Y.C. (2019). Combining orthogonal CRISPR and CRISPRi systems for genome engineering and metabolic pathway modulation in *Escherichia coli*. *Biotechnol. Bioeng.* *116*, 1066–1079.
14. Gilbert, L.A., Larson, M.H., Morsut, L., Liu, Z., Brar, G.A., Torres, S.E., Stern-Ginossar, N., Brandman, O., Whitehead, E.H., Doudna, J.A., et al. (2013). CRISPR-mediated modular RNA-guided regulation of transcription in eukaryotes. *Cell* *154*, 442–451.
15. Konermann, S., Brigham, M.D., Trevino, A.E., Joung, J., Abudayyeh, O.O., Barcena, C., Hsu, P.D., Habib, N., Gootenberg, J.S., Nishimasu, H., et al. (2015). Genome-scale transcriptional activation by an engineered CRISPR-Cas9 complex. *Nature* *517*, 583–588.
16. Joung, J., Engreitz, J.M., Konermann, S., Abudayyeh, O.O., Verdine, V.K., Aguet, F., Gootenberg, J.S., Sanjana, N.E., Wright, J.B., Fulco, C.P., et al. (2017). Genome-scale activation screen identifies a lncRNA locus regulating a gene neighbourhood. *Nature* *548*, 343–346.
17. Yang, J., Rajan, S.S., Friedrich, M.J., Lan, G., Zou, X., Ponstingl, H., Garyfallos, D.A., Liu, P., Bradley, A., and Metzkapian, E. (2019). Genome-scale CRISPRa screen identifies novel factors for cellular reprogramming. *Stem Cell Reports* *12*, 757–771.
18. Shao, J., Wang, M., Yu, G., Zhu, S., Yu, Y., Heng, B.C., Wu, J., and Ye, H. (2018). Synthetic far-red light-mediated CRISPR-dCas9 device for inducing functional neuronal differentiation. *Proc. Natl. Acad. Sci. USA* *115*, E6722–E6730.
19. Airene, K.J., Hu, Y.-C., Kost, T.A., Smith, R.H., Kotin, R.M., Ono, C., Matsuura, Y., Wang, S., and Ylä-Herttua, S. (2013). Baculovirus: an insect-derived vector for diverse gene transfer applications. *Mol. Ther.* *21*, 739–749.
20. Chuang, C.-K., Wong, T.-H., Hwang, S.-M., Chang, Y.-H., Chen, G.Y., Chiu, Y.-C., Huang, S.F., and Hu, Y.C. (2009). Baculovirus transduction of mesenchymal stem cells: in vitro responses and in vivo immune responses after cell transplantation. *Mol. Ther.* *17*, 889–896.
21. Lo, W.-H., Hwang, S.-M., Chuang, C.-K., Chen, C.-Y., and Hu, Y.-C. (2009). Development of a hybrid baculoviral vector for sustained transgene expression. *Mol. Ther.* *17*, 658–666.
22. Lin, C.-Y., Wang, Y.-H., Li, K.-C., Sung, L.-Y., Yeh, C.-L., Lin, K.-J., Yen, T.C., Chang, Y.H., and Hu, Y.C. (2015). Healing of massive segmental femoral bone defects in minipigs by allogenic ASCs engineered with FLPo/Frt-based baculovirus vectors. *Biomaterials* *50*, 98–106.
23. Chen, H.-C., Sung, L.-Y., Lo, W.-H., Chuang, C.-K., Wang, Y.-H., Lin, J.-L., and Hu, Y.C. (2008). Combination of baculovirus-mediated BMP-2 expression and rotating-shaft bioreactor culture synergistically enhances cartilage formation. *Gene Ther.* *15*, 309–317.
24. Lu, C.-H., Yeh, T.-S., Yeh, C.-L., Fang, Y.-H.D., Sung, L.-Y., Lin, S.-Y., Yen, T.C., Chang, Y.H., and Hu, Y.C. (2014). Regenerating cartilages by engineered ASCs: prolonged TGF- $\beta$ 3/BMP-6 expression improved articular cartilage formation and restored zonal structure. *Mol. Ther.* *22*, 186–195.
25. Lin, C.-Y., Chang, Y.-H., Li, K.-C., Lu, C.-H., Sung, L.-Y., Yeh, C.-L., Lin, K.J., Huang, S.F., Yen, T.C., and Hu, Y.C. (2013). The use of ASCs engineered to express BMP2 or TGF- $\beta$ 3 within scaffold constructs to promote calvarial bone repair. *Biomaterials* *34*, 9401–9412.
26. Lin, C.-Y., Lin, K.-J., Kao, C.-Y., Chen, M.-C., Lo, W.H., Yen, T.C., Chang, Y.H., and Hu, Y.C. (2011). The role of adipose-derived stem cells engineered with the persistently expressing hybrid baculovirus in the healing of massive bone defects. *Biomaterials* *32*, 6505–6514.
27. Hsu, M.-N., Liao, H.-T., Li, K.-C., Chen, H.-H., Yen, T.-C., Makarevich, P., Parfyonova, Y., and Hu, Y.C. (2017). Adipose-derived stem cell sheets functionalized by hybrid baculovirus for prolonged GDNF expression and improved nerve regeneration. *Biomaterials* *140*, 189–200.
28. Yeh, T.-S., Fang, Y.H., Lu, C.-H., Chiu, S.-C., Yeh, C.-L., Yen, T.-C., Parfyonova, Y., and Hu, Y.C. (2014). Baculovirus-transduced, VEGF-expressing adipose-derived stem cell sheet for the treatment of myocardium infarction. *Biomaterials* *35*, 174–184.
29. Sung, L.-Y., Chen, C.-L., Lin, S.-Y., Hwang, S.-M., Lu, C.-H., Li, K.-C., Lan, A.S., and Hu, Y.C. (2013). Enhanced and prolonged baculovirus-mediated expression by incorporating recombinase system and in cis elements: a comparative study. *Nucleic Acids Res.* *41*, e139.
30. Sung, L.-Y., Chen, C.-L., Lin, S.-Y., Li, K.-C., Yeh, C.-L., Chen, G.-Y., Lin, C.Y., and Hu, Y.C. (2014). Efficient gene delivery into cell lines and stem cells using baculovirus. *Nat. Protoc.* *9*, 1882–1899.
31. Lo, S.-C., Li, K.-C., Chang, Y.-H., Hsu, M.-N., Sung, L.-Y., Vu, T.A., and Hu, Y.C. (2017). Enhanced critical-size calvarial bone healing by ASCs engineered with Cre/loxP-based hybrid baculovirus. *Biomaterials* *124*, 1–11.
32. Black, J.B., Adler, A.F., Wang, H.G., D'ippolito, A.M., Hutchinson, H.A., Reddy, T.E., Pitt, G.S., Leong, K.W., and Gersbach, C.A. (2016). Targeted epigenetic remodeling of endogenous loci by CRISPR/Cas9-based transcriptional activators directly converts fibroblasts to neuronal cells. *Cell Stem Cell* *19*, 406–414.
33. Kearns, N.A., Genga, R.M.J., Enuameh, M.S., Garber, M., Wolfe, S.A., and Maehr, R. (2014). Cas9 effector-mediated regulation of transcription and differentiation in human pluripotent stem cells. *Development* *141*, 219–223.
34. Staines, K.A., MacRae, V.E., and Farquharson, C. (2012). The importance of the SIBLING family of proteins on skeletal mineralisation and bone remodelling. *J. Endocrinol.* *214*, 241–255.
35. Greenblatt, M.B., Tsai, J.N., and Wein, M.N. (2017). Bone turnover markers in the diagnosis and monitoring of metabolic bone disease. *Clin. Chem.* *63*, 464–474.
36. Jost, M., Chen, Y., Gilbert, L.A., Horlbeck, M.A., Krenning, L., Menchon, G., Rai, A., Cho, M.Y., Stern, J.J., Protal, A.E., et al. (2017). Combined CRISPRi/a-based chemical genetic screens reveal that Rigosertib is a microtubule-destabilizing agent. *Mol. Cell* *68*, 210–223.e6.
37. Rubin, A.J., Parker, K.R., Satpathy, A.T., Qi, Y., Wu, B., Ong, A.J., Mumbach, M.R., Ji, A.L., Kim, D.S., Cho, S.W., et al. (2019). Coupled single-cell CRISPR screening and epigenomic profiling reveals causal gene regulatory networks. *Cell* *176*, 361–376.e17.
38. Gilbert, L.A., Horlbeck, M.A., Adamson, B., Villalta, J.E., Chen, Y., Whitehead, E.H., Guimaraes, C., Panning, B., Ploegh, H.L., Bassik, M.C., et al. (2014). Genome-scale CRISPR-mediated control of gene repression and activation. *Cell* *159*, 647–661.
39. Bester, A.C., Lee, J.D., Chavez, A., Lee, Y.R., Nachmani, D., Vora, S., Victor, J., Sauvageau, M., Monteleone, E., Rinn, J.L., et al. (2018). An integrated genome-wide CRISPRa approach to functionalize lncRNAs in drug resistance. *Cell* *173*, 649–664.e20.
40. Liu, Y., Yu, C., Daley, T.P., Wang, F., Cao, W.S., Bhat, S., Lin, X., Still, C., 2nd, Liu, H., Zhao, D., et al. (2018). CRISPR activation screens systematically identify factors that drive neuronal fate and reprogramming. *Cell Stem Cell* *23*, 758–771.e8.
41. Liu, Y., Han, J., Chen, Z., Wu, H., Dong, H., and Nie, G. (2017). Engineering cell signaling using tunable CRISPR-Cpf1-based transcription factors. *Nat. Commun.* *8*, 2095.
42. Liu, P., Chen, M., Liu, Y., Qi, L.S., and Ding, S. (2018). CRISPR-based chromatin remodeling of the endogenous Oct4 or Sox2 locus enables reprogramming to pluripotency. *Cell Stem Cell* *22*, 252–261.e4.
43. Chang, Y.K., Hwang, J.S., Chung, T.Y., and Shin, Y.J. (2018). SOX2 activation using CRISPR/dCas9 promotes wound healing in corneal endothelial cells. *Stem Cells* *36*, 1851–1862.
44. Liao, H.-K., Hatanaka, F., Araoka, T., Reddy, P., Wu, M.-Z., Sui, Y., Yamauchi, T., Sakurai, M., O'Keefe, D.D., Núñez-Delgado, E., et al. (2017). In vivo target gene activation via CRISPR/Cas9-mediated trans-epigenetic modulation. *Cell* *171*, 1495–1507.e15.
45. Hsu, M.-N., Liao, H.-T., Truong, V.A., Huang, K.-L., Yu, F.-J., Chen, H.-H., Nguyen, T.K.N., Makarevich, P., Parfyonova, Y., and Hu, Y.C. (2019). CRISPR-based activation of endogenous neurotrophic genes in adipose stem cell sheets to stimulate peripheral nerve regeneration. *Theranostics* *9*, 6099–6111.

46. Truong, V.A., Hsu, M.-N., Kieu Nguyen, N.T., Lin, M.-W., Shen, C.-C., Lin, C.-Y., and Hu, Y.C. (2019). CRISPRai for simultaneous gene activation and inhibition to promote stem cell chondrogenesis and calvarial bone regeneration. *Nucleic Acids Res.* *47*, e74.
47. Chavez, A., Tuttle, M., Pruitt, B.W., Ewen-Campen, B., Chari, R., Ter-Ovanesyan, D., Haque, S.J., Cecchi, R.J., Kowal, E.J.K., Buchthal, J., et al. (2016). Comparison of Cas9 activators in multiple species. *Nat. Methods* *13*, 563–567.
48. La Russa, M.F., and Qi, L.S. (2015). The new state of the art: Cas9 for gene activation and repression. *Mol. Cell. Biol.* *35*, 3800–3809.
49. Ross, S.E., Hemati, N., Longo, K.A., Bennett, C.N., Lucas, P.C., Erickson, R.L., and MacDougald, O.A. (2000). Inhibition of adipogenesis by Wnt signaling. *Science* *289*, 950–953.
50. Gozo, M.C., Aspuria, P.J., Cheon, D.J., Walts, A.E., Berel, D., Miura, N., Karlan, B.Y., and Orsulic, S. (2013). Foxc2 induces Wnt4 and Bmp4 expression during muscle regeneration and osteogenesis. *Cell Death Differ.* *20*, 1031–1042.
51. Zhou, P., Li, Y., Di, R., Yang, Y., Meng, S., Song, F., and Ma, L. (2019). H19 and Foxc2 synergistically promotes osteogenic differentiation of BMSCs via Wnt- $\beta$ -catenin pathway. *J. Cell. Physiol.* *234*, 13799–13806.
52. Chang, J., Sonoyama, W., Wang, Z., Jin, Q., Zhang, C., Krebsbach, P.H., Giannobile, W., Shi, S., and Wang, C.Y. (2007). Noncanonical Wnt-4 signaling enhances bone regeneration of mesenchymal stem cells in craniofacial defects through activation of p38 MAPK. *J. Biol. Chem.* *282*, 30938–30948.
53. Yu, B., Chang, J., Liu, Y., Li, J., Kevork, K., Al-Hezaimi, K., Graves, D.T., Park, N.H., and Wang, C.Y. (2014). Wnt4 signaling prevents skeletal aging and inflammation by inhibiting nuclear factor- $\kappa$ B. *Nat. Med.* *20*, 1009–1017.
54. Gerin, I., Bommer, G.T., Lidell, M.E., Cederberg, A., Enerback, S., and MacDougald, O.A. (2009). On the role of FOX transcription factors in adipocyte differentiation and insulin-stimulated glucose uptake. *J. Biol. Chem.* *284*, 10755–10763.
55. Wang, J., and Yue, X. (2017). Role and importance of the expression of transcription factor FOXC2 in cervical cancer. *Oncol. Lett.* *14*, 6627–6631.
56. You, W., Gao, H., Fan, L., Duan, D., Wang, C., and Wang, K. (2013). Foxc2 regulates osteogenesis and angiogenesis of bone marrow mesenchymal stem cells. *BMC Musculoskelet. Disord.* *14*, 199.
57. Luo, W.Y., Shih, Y.S., Hung, C.L., Lo, K.W., Chiang, C.S., Lo, W.H., Huang, S.F., Wang, S.C., Yu, C.F., Chien, C.H., and Hu, Y.C. (2012). Development of the hybrid Sleeping Beauty: baculovirus vector for sustained gene expression and cancer therapy. *Gene Ther.* *19*, 844–851.
58. Evans, C.H. (2012). Gene delivery to bone. *Adv. Drug Deliv. Rev.* *64*, 1331–1340.
59. Larouche, J., and Aguilar, C.A. (2019). New technologies to enhance in vivo reprogramming for regenerative medicine. *Trends Biotechnol.* *37*, 604–617.
60. Komor, A.C., Badran, A.H., and Liu, D.R. (2017). CRISPR-based technologies for the manipulation of eukaryotic genomes. *Cell* *168*, 20–36.
61. Cawthorn, W.P., Bree, A.J., Yao, Y., Du, B., Hemati, N., Martínez-Santibañez, G., and MacDougald, O.A. (2012). Wnt6, Wnt10a and Wnt10b inhibit adipogenesis and stimulate osteoblastogenesis through a  $\beta$ -catenin-dependent mechanism. *Bone* *50*, 477–489.
62. Ichida, F., Nishimura, R., Hata, K., Matsubara, T., Ikeda, F., Hisada, K., Yatani, H., Cao, X., Komori, T., Yamaguchi, A., and Yoneda, T. (2004). Reciprocal roles of MSX2 in regulation of osteoblast and adipocyte differentiation. *J. Biol. Chem.* *279*, 34015–34022.
63. Hilton, I.B., D'Ippolito, A.M., Vockley, C.M., Thakore, P.I., Crawford, G.E., Reddy, T.E., and Gersbach, C.A. (2015). Epigenome editing by a CRISPR-Cas9-based acetyltransferase activates genes from promoters and enhancers. *Nat. Biotechnol.* *33*, 510–517.
64. Shen, H.-C., Lee, H.-P., Lo, W.-H., Yang, D.-G., and Hu, Y.-C. (2007). Baculovirus-mediated gene transfer is attenuated by sodium bicarbonate. *J. Gene Med.* *9*, 470–478.
65. Niu, H., Ma, Y., Wu, G., Duan, B., Wang, Y., Yuan, Y., and Liu, C. (2019). Multicellularity-interweaved bone regeneration of BMP-2-loaded scaffold with orchestrated kinetics of resorption and osteogenesis. *Biomaterials* *216*, 119216.



**Supplemental Information**

**Coactivation of Endogenous *Wnt10b* and *Foxc2* by  
CRISPR Activation Enhances BMSC Osteogenesis  
and Promotes Calvarial Bone Regeneration**

**Mu-Nung Hsu, Kai-Lun Huang, Fu-Jen Yu, Po-Liang Lai, Anh Vu Truong, Mei-Wei Lin, Nuong Thi Kieu Nguyen, Chih-Che Shen, Shiaw-Min Hwang, Yu-Han Chang, and Yu-Chen Hu**

# Supporting Info

## Supplemental methods

### Isolation and culture of BMSCs

To isolate BMSCs, bone marrow of 4-week-old Sprague Dawley (SD) rats (Lesco Biotech, Taiwan) was flushed out of bilateral rat tibias and femora using  $\alpha$ -MEM medium (Gibco) containing 10% fetal bovine serum (FBS, Gibco), 100 U/mL penicillin, 100 U/mL streptomycin and 4 ng/mL bFGF (Lo, et al., 2017). All cells were cultured for two days and non-adherent cells were discarded. The adherent cells were passaged 3-5 times and the resultant BMSCs were used for subsequent experiments.

### Alizarin Red staining and calcium deposition

Rat BMSCs were cultured with osteoinduction medium for 14 days and stained by Alizarin Red S (A5533, Sigma-Aldrich), which chelates with calcium to form an Alizarin red-calcium complex (red color). The cells were washed twice with PBS and fixed with 4% paraformaldehyde for 10 min. After fixation, the cells were washed 3 times with deionized water and then stained with 40 mM Alizarin Red S (pH 4.2) for 10 min, followed by 3 PBS washes and microscopic observation.

To quantify the Alizarin red-calcium complex, the Alizarin Red S stain was extracted using 10% acetic acid, by 30 min incubation at room temperature with shaking. After incubation, the sample was heated to 85°C for 10 min and placed on ice for 5 min. After extraction, the sample was neutralized with 10% ammonium hydroxide and assayed using a spectrophotometer to measure optical density at 405 nm (OD<sub>405</sub>).

Alternatively, the cells were washed 3 times with PBS, followed by incubation with 0.6 N HCl overnight. The supernatant was collected the next day for calcium phosphate deposition quantification using the CALCIUM liquicolor Complete Test kit (HUMAN Inc.). The calcium deposition is expressed as mg/dl.

### Oil Red O staining and quantification

Rat BMSCs were cultured in adipoinduction medium for 14 days and stained by Oil Red O. After removing the medium, the cells were washed twice with PBS and fixed with 4% paraformaldehyde for 30 min. After fixation, the cells were washed 2 times with deionized water and then incubated with isopropanol (60 %) at room temperature for 5 min. After incubation and isopropanol removal, the cells were stained with Oil Red O solution (dissolved in 60 % isopropanol, 1.8 mg/ml) for 10 min, followed by 5 washes with deionized water, and microscopic observation. For quantification, the cells were washed 3 times with 60% isopropanol for 5 min with gentle shaking, followed by wash with 100% isopropanol for 5 min to extract Oil Red O stain. The optical density at 500 nm (OD<sub>500</sub>) of the samples was assayed using a spectrophotometer.

### Histological and immunohistochemical staining

After  $\mu$ CT scanning, calvarial bone specimens were removed from the rats and immersed in Osteosoft® (Merck) for 15-20 days for complete decalcification, and dehydrated in a series of graded concentration of ethanol from 70% to 100%. After embedding in paraffin and coronal sectioning (thickness=10  $\mu$ m), the sections were stained with hematoxylin and eosin (H&E). Alternatively, rehydrated sections were subjected to trypsin treatment for 1 h at 37 °C for antigen retrieval, followed by blocking in 5% skim milk and immunohistochemical staining. The primary antibodies were rabbit anti-OPN (1:200, Abcam) and mouse anti-BSP (1:200, Abcam). The secondary antibodies were goat anti-rabbit IgG-HRP (1:5000, GeneTex) and goat anti-mouse IgG-HRP (1:5000, Invitrogen). All of the samples were developed with 3,3'-Diaminobenzidine (DAB, Sigma) and counterstained with Gill's Hematoxylin (Dako). The histochemical staining of tartrate-resistant acid phosphatase (TRAP) was performed using leukocyte acid phosphatase kit (Sigma).

## Supplemental Tables

**Table. S1. Spacer (targeting) sequences for Wnt10b and Foxc2\*.**

| Target gene | Distance to TSS | Spacer sequence (5'→3') |
|-------------|-----------------|-------------------------|
| Wnt10b      | -74             | GGGGAGCGACTGCGTTCTCC    |
| Wnt10b      | -95             | GTGTGTGTGCACGCTTTGGA    |
| Wnt10b      | -394            | GCACTTTCGGTGGACAAACG    |
| Foxc2       | -97             | GATGATTGGTGCAAATTC      |
| Foxc2       | -162            | GTCTTAGAGCCGACGGATTC    |
| Foxc2       | -219            | GGTTAACTTGAGCTGGGGTT    |

\*The 20-nt spacer sequences were designed using a guide RNA design tool CRISPR-ERA ([crispr-era.stanford.edu/](http://crispr-era.stanford.edu/)). The sequences with the highest efficacy and specificity scores were chosen for construction of sgRNA. TSS, transcription start site.



**Table. S2.** Primer sequences used for qRT-PCR

| <b>Gene</b>     | <b>Forward</b>         | <b>Reverse</b>         |
|-----------------|------------------------|------------------------|
| Wnt10b          | CCTGCACCTGAACCGCTGGA   | CTAAGGGCGGAGGCCGAGAC   |
| Foxc2           | CGCTCTTACGCGCCCTACCA   | TCTTCTCCGGCGCGTTCTGG   |
| Runx2           | GCTTCTCCAACCCACGAATG   | GAAGTATAGGACGCTGACGA   |
| OPN             | CTGCCAGCACACAAGCAGAC   | TCTGTGGCATCGGGATACTG   |
| OCN             | CTCTGTCTCTCTGACCTCACAG | CAGGTCCTAAATAGTGATACCG |
| OSX             | ATGGCGTCCTCTCTGCTTG    | TGAAAGGTCAGCGTATGGCTT  |
| PPAR $\gamma$   | CGCATTTTTCAAGGGTGCCA   | TGGACACCATACTTGAGCAGA  |
| C/EBP- $\alpha$ | TCACTTGAGTTCCAGATCG    | TTGACCAAGGAGCTCTCAGG   |
| FABP4           | GGATGGAAAGTCGACCACCATA | TCACGCCTTTCATGACACATTC |

## Supplemental Figures

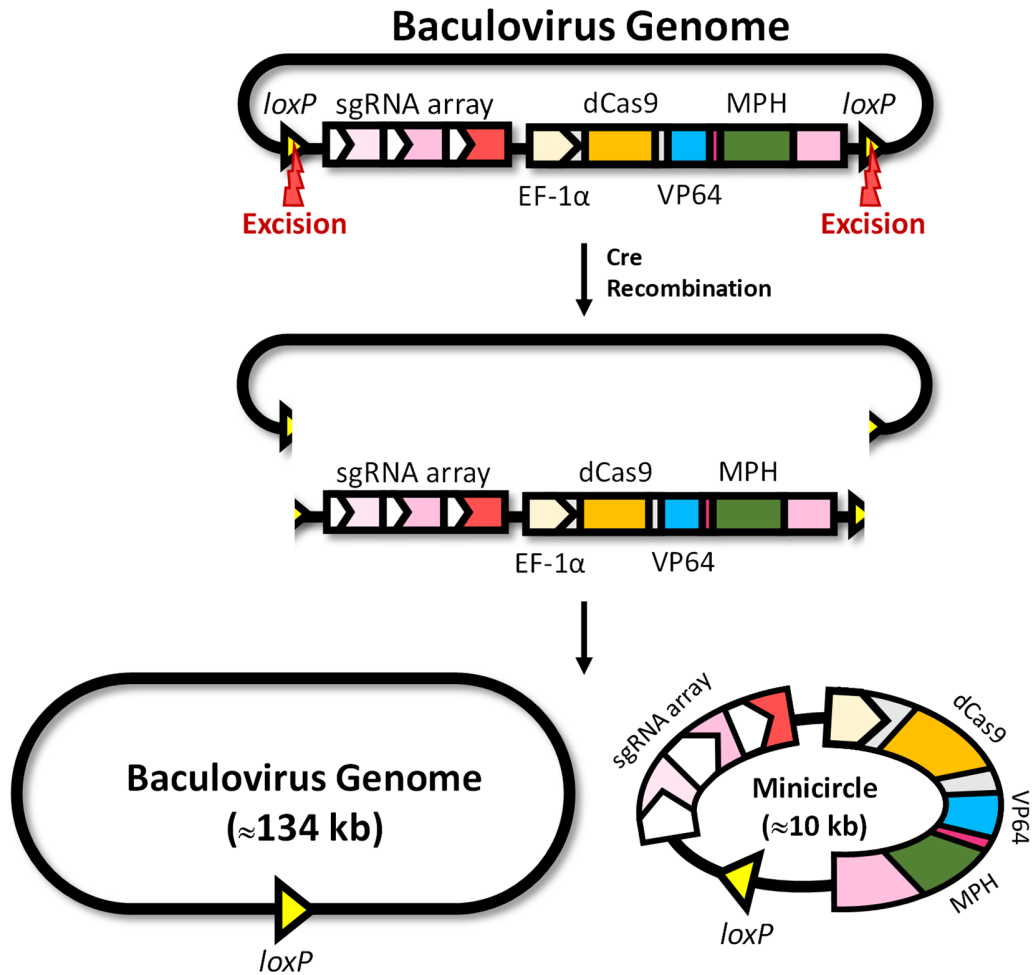

**Fig. S1. Schematic illustration of Bac-CRISPRa system.** The all-in-one hybrid baculovirus genome carried the entire SAM-based CRISPRa system which was flanked by two *loxP* sequences. Co-transduction of cells with Bac-Cre and Bac-CRISPRa led to Cre expression. Cre recognized the two *loxP* sequences and excised the CRISPRa system off baculovirus genome, leading to recirculation of the CRISPRa system into a DNA minicircle ( $\approx 10$  kb). The DNA minicircle was tremendously smaller than the baculovirus genome ( $\approx 134$  kb), devoid of bacterial sequences and able to persist in the cells for a longer period of time to prolong the expression of the CRISPRa system.

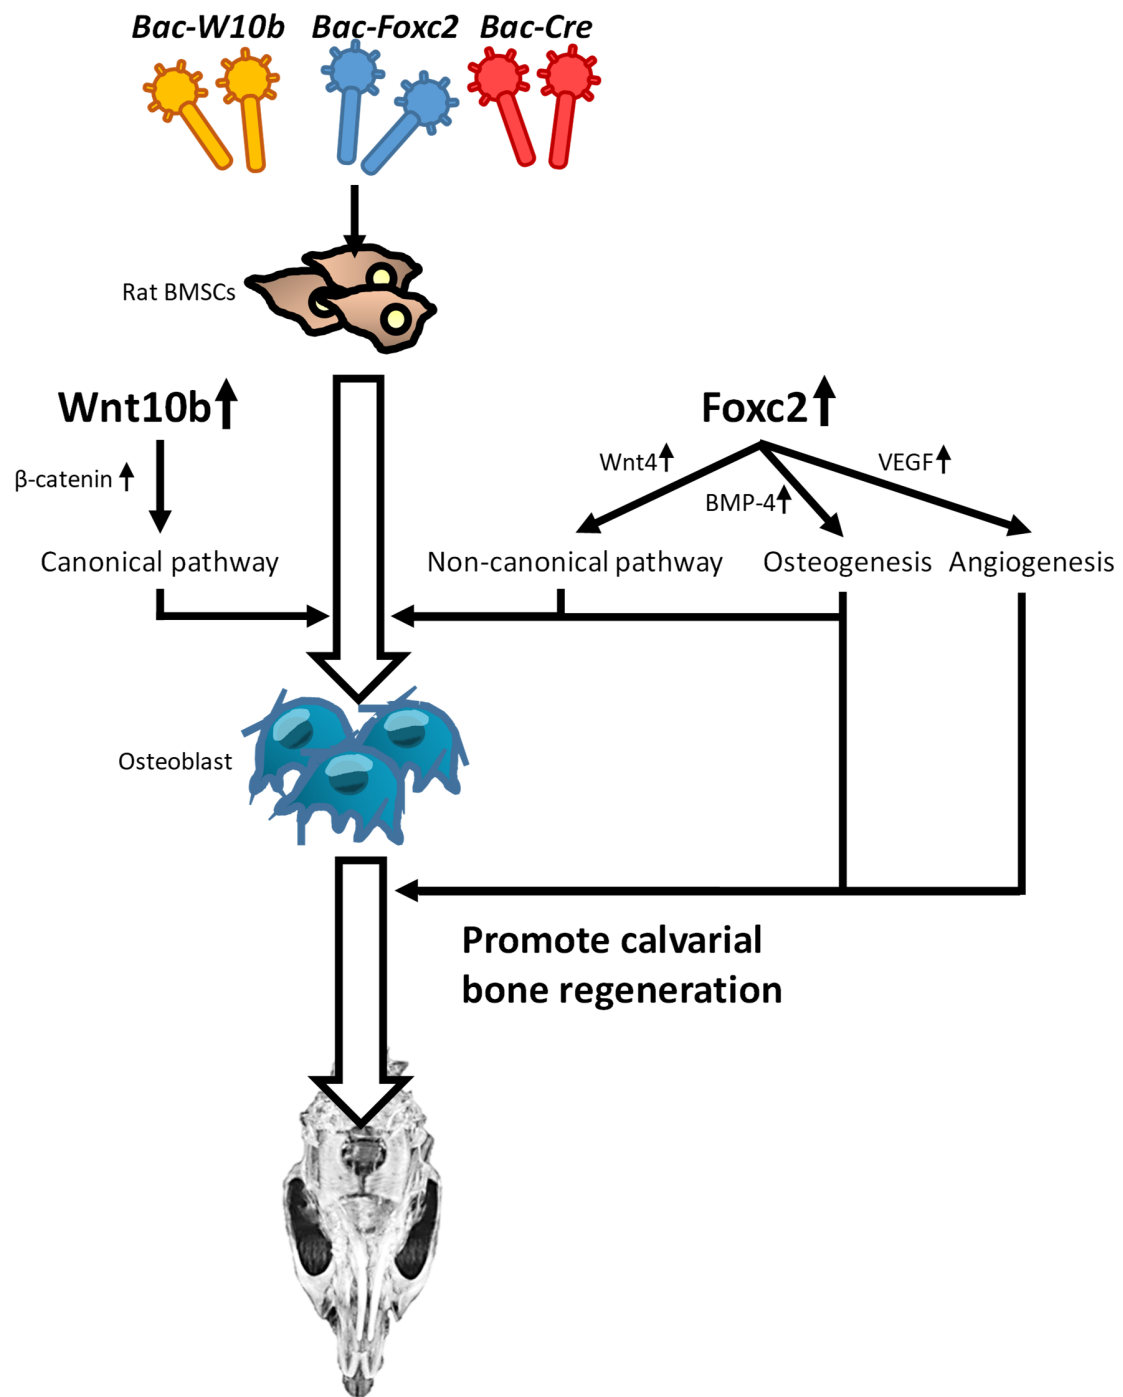

**Fig. S2. CRISPRa system promoted osteogenesis through canonical and non-canonical Wnt pathways in rat BMSCs.** After rat BMSCs were co-transduced with the hybrid Bac-CRISPRa system, the CRISPRa system activated *Wnt10b* and *Foxc2* expression and promote canonical and non-canonical Wnt pathways to enhance the osteogenic differentiation and inhibited adipogenic differentiation. *Foxc2* activation also enhanced *BMP-4* and *VEGF* expression to promote *in vivo* healing.
